# Supplementary material for: Machine learning interatomic potentials in engineering perspective for developing cathode materials
Source: Royal Society of Chemistry journal article supplement (doi:10.1039/d4ta03452j), 2024-01-01
Supplement: d4ta03452j1.pdf [file d4ta03452j1.pdf]

1

2

3

Electronic Supplementary Information

4

**Machine Learning Interatomic Potentials in Engineering Perspective for**

5

**Developing Cathode Materials**

6

7

Dohyeong Kwon<sup>a</sup> and Duho Kim<sup>abc\*</sup>

8

a. Department of Mechanical Engineering (Integrated Engineering Program), Kyung Hee

9

University, 1732, Deogyong-daero, Giheung-gu, Yongin-si, Gyeonggi-do, 17104, Republic of

10

Korea.

11

b. Department of KHU-KIST Convergence Science and Technology, Kyung Hee University,

12

23, Kyunghee-daero Dongdaemun-gu, Seoul 02447, Republic of Korea

13

c. Prediction Co. Ltd., Yongin 17107, Republic of Korea

14

E-mail: [duhokim@khu.ac.kr](mailto:duhokim@khu.ac.kr) (Prof. D. Kim).

15

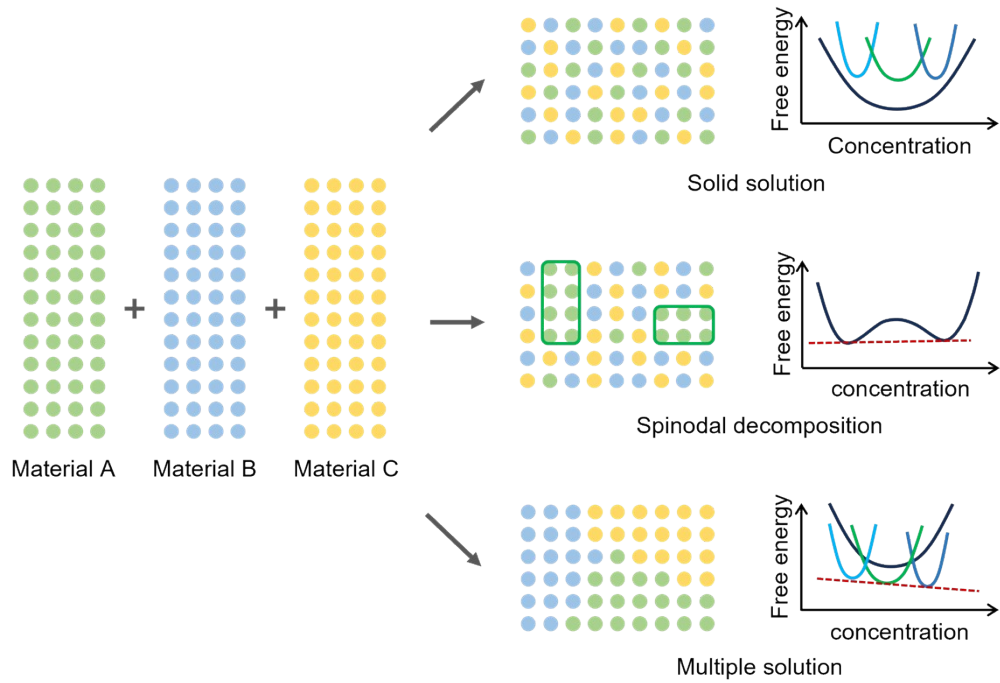

1

2 **Fig. S1.** Possible cases for multi-materials mixing and synthesis reaction.

3

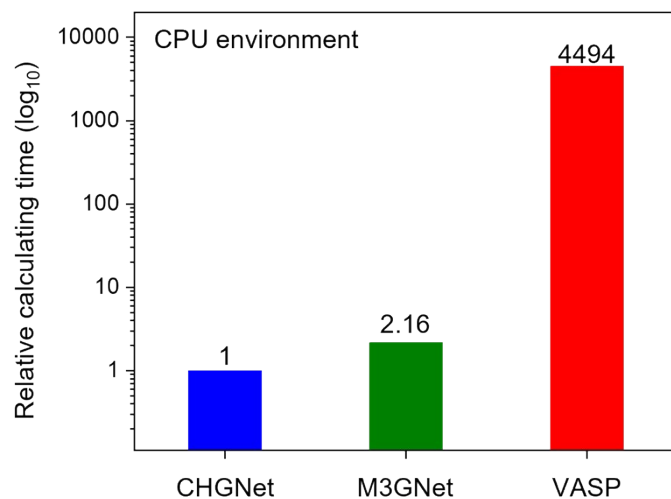

1

2 **Fig. S2.** The overall computational differences between CHGNet, M3GNet, and VASP, with all  
3 calculations performed in the same CPU environment. Note that the total computation time may  
4 vary depending on the type and performance of the hardware.

5







|     |                          |                          |                          |                          |
|-----|--------------------------|--------------------------|--------------------------|--------------------------|
| 123 | ('0.00', '0.00', '0.00') | ('0.00', '0.50', '0.50') | ('0.83', '0.50', '0.00') | ('0.17', '0.00', '0.50') |
| 124 | ('0.00', '0.00', '0.00') | ('0.00', '0.50', '0.50') | ('0.50', '0.50', '0.00') | ('0.17', '0.00', '0.50') |
| 125 | ('0.00', '0.00', '0.00') | ('0.00', '0.50', '0.50') | ('0.50', '0.50', '0.00') | ('0.83', '0.50', '0.00') |
| 126 | ('0.00', '0.00', '0.00') | ('0.00', '0.50', '0.50') | ('0.17', '0.50', '0.00') | ('0.17', '0.00', '0.50') |
| 127 | ('0.00', '0.00', '0.00') | ('0.00', '0.50', '0.50') | ('0.17', '0.50', '0.00') | ('0.83', '0.50', '0.00') |
| 128 | ('0.00', '0.00', '0.00') | ('0.00', '0.50', '0.50') | ('0.50', '0.00', '0.50') | ('0.50', '0.50', '0.00') |
| 129 | ('0.00', '0.00', '0.00') | ('0.00', '0.50', '0.50') | ('0.67', '0.50', '0.50') | ('0.17', '0.00', '0.50') |
| 130 | ('0.00', '0.00', '0.00') | ('0.00', '0.50', '0.50') | ('0.67', '0.50', '0.50') | ('0.83', '0.50', '0.00') |
| 131 | ('0.00', '0.00', '0.00') | ('0.00', '0.50', '0.50') | ('0.67', '0.50', '0.50') | ('0.50', '0.50', '0.00') |
| 132 | ('0.00', '0.00', '0.00') | ('0.00', '0.50', '0.50') | ('0.67', '0.50', '0.50') | ('0.17', '0.50', '0.00') |
| 133 | ('0.00', '0.00', '0.00') | ('0.00', '0.50', '0.50') | ('0.67', '0.50', '0.50') | ('0.83', '0.00', '0.50') |
| 134 | ('0.00', '0.00', '0.00') | ('0.00', '0.50', '0.50') | ('0.67', '0.50', '0.50') | ('0.50', '0.00', '0.50') |
| 135 | ('0.00', '0.00', '0.00') | ('0.00', '0.50', '0.50') | ('0.33', '0.50', '0.50') | ('0.67', '0.50', '0.50') |
| 136 | ('0.00', '0.00', '0.00') | ('0.67', '0.00', '0.00') | ('0.33', '0.50', '0.50') | ('0.67', '0.50', '0.50') |
| 137 | ('0.00', '0.00', '0.00') | ('0.67', '0.00', '0.00') | ('0.00', '0.50', '0.50') | ('0.67', '0.50', '0.50') |
| 138 | ('0.00', '0.00', '0.00') | ('0.67', '0.00', '0.00') | ('0.00', '0.50', '0.50') | ('0.33', '0.50', '0.50') |
| 139 | ('0.33', '0.00', '0.00') | ('0.67', '0.00', '0.00') | ('0.83', '0.00', '0.50') | ('0.83', '0.50', '0.00') |

1 **Table S1.** The Ti initial coordinates in the rock salt  $\text{Li}_2\text{TiA}_3$  (where A represents anions,

2 specifically oxygen and sulfur).

3

| Rank | Li <sub>2</sub> TiO <sub>3</sub> (eV / f.u.) |                   |            |                   |            |                   | Li <sub>2</sub> TiS <sub>3</sub> (eV / f.u.) |                   |            |                   |            |                   |
|------|----------------------------------------------|-------------------|------------|-------------------|------------|-------------------|----------------------------------------------|-------------------|------------|-------------------|------------|-------------------|
|      | CHGNet                                       |                   | M3GNet     |                   | PBE        |                   | CHGNet                                       |                   | M3GNet     |                   | PBE        |                   |
|      | Struct. ID                                   | Energy difference | Struct. ID | Energy difference | Struct. ID | Energy difference | Struct. ID                                   | Energy difference | Struct. ID | Energy difference | Struct. ID | Energy difference |
| 1    | 76                                           | 0.00000           | 83         | 0.00000           | 92         | 0.00000           | 76                                           | 0.00000           | 92         | 0.00000           | 76         | 0.00000           |
| 2    | 92                                           | 0.00008           | 76         | 0.00012           | 83         | 0.00011           | 83                                           | 0.00029           | 76         | 0.00009           | 104        | 0.00001           |
| 3    | 83                                           | 0.00009           | 92         | 0.00025           | 76         | 0.00014           | 92                                           | 0.00043           | 104        | 0.00013           | 92         | 0.00001           |
| 4    | 104                                          | 0.00019           | 104        | 0.00026           | 104        | 0.00025           | 104                                          | 0.00084           | 83         | 0.00027           | 83         | 0.00008           |
| 5    | 128                                          | 0.09589           | 112        | 0.12173           | 122        | 0.17606           | 121                                          | 0.03024           | 41         | 0.01421           | 81         | 0.09893           |
| 6    | 46                                           | 0.14129           | 26         | 0.12176           | 121        | 0.17607           | 122                                          | 0.03036           | 121        | 0.01424           | 78         | 0.09988           |
| 7    | 26                                           | 0.14191           | 46         | 0.12178           | 41         | 0.17628           | 7                                            | 0.03093           | 46         | 0.01436           | 95         | 0.10034           |
| 8    | 115                                          | 0.14211           | 7          | 0.12179           | 46         | 0.17629           | 41                                           | 0.03094           | 122        | 0.01438           | 56         | 0.10036           |
| 9    | 121                                          | 0.14213           | 121        | 0.12181           | 115        | 0.17630           | 115                                          | 0.03263           | 7          | 0.01442           | 97         | 0.10054           |
| 10   | 41                                           | 0.14214           | 115        | 0.12183           | 7          | 0.17630           | 26                                           | 0.03376           | 115        | 0.01447           | 41         | 0.10308           |
| 11   | 112                                          | 0.14215           | 41         | 0.12185           | 26         | 0.17632           | 112                                          | 0.03401           | 26         | 0.01450           | 7          | 0.10309           |
| 12   | 7                                            | 0.14297           | 122        | 0.12189           | 112        | 0.17633           | 46                                           | 0.03534           | 112        | 0.01453           | 122        | 0.10330           |
| 13   | 122                                          | 0.14303           | 70         | 0.12757           | 96         | 0.29016           | 4                                            | 0.07217           | 70         | 0.01754           | 26         | 0.10332           |
| 14   | 113                                          | 0.21568           | 128        | 0.12774           | 101        | 0.29023           | 136                                          | 0.07396           | 128        | 0.01763           | 121        | 0.10332           |
| 15   | 117                                          | 0.21573           | 138        | 0.12991           | 80         | 0.29025           | 2                                            | 0.07444           | 138        | 0.02137           | 46         | 0.10333           |
| 16   | 21                                           | 0.21575           | 2          | 0.12993           | 120        | 0.29057           | 138                                          | 0.07721           | 136        | 0.02145           | 115        | 0.10333           |
| 17   | 114                                          | 0.21578           | 4          | 0.12995           | 61         | 0.29152           | 70                                           | 0.09876           | 4          | 0.02152           | 112        | 0.10334           |
| 18   | 116                                          | 0.21578           | 136        | 0.12996           | 49         | 0.29159           | 96                                           | 0.09970           | 2          | 0.02176           | 59         | 0.11359           |
| 19   | 16                                           | 0.21581           | 64         | 0.17038           | 27         | 0.29183           | 49                                           | 0.10074           | 116        | 0.04461           | 48         | 0.11501           |
| 20   | 120                                          | 0.21582           | 23         | 0.17067           | 12         | 0.29195           | 101                                          | 0.10170           | 114        | 0.04462           | 54         | 0.11998           |
| 21   | 17                                           | 0.21583           | 12         | 0.20911           | 13         | 0.29195           | 80                                           | 0.10200           | 120        | 0.04477           | 52         | 0.12165           |
| 22   | 12                                           | 0.21584           | 36         | 0.20916           | 36         | 0.29205           | 27                                           | 0.10237           | 12         | 0.04495           | 33         | 0.12174           |
| 23   | 36                                           | 0.21585           | 113        | 0.20919           | 116        | 0.29257           | 128                                          | 0.10289           | 113        | 0.04497           | 29         | 0.12176           |
| 24   | 119                                          | 0.21585           | 42         | 0.20923           | 17         | 0.29270           | 61                                           | 0.10602           | 117        | 0.04502           | 57         | 0.13474           |
| 25   | 42                                           | 0.21587           | 21         | 0.20923           | 16         | 0.29291           | 42                                           | 0.10706           | 17         | 0.04503           | 87         | 0.13963           |
| 26   | 101                                          | 0.25222           | 114        | 0.20925           | 19         | 0.29291           | 12                                           | 0.10724           | 42         | 0.04504           | 17         | 0.14159           |
| 27   | 27                                           | 0.25225           | 116        | 0.20925           | 117        | 0.29298           | 17                                           | 0.10739           | 16         | 0.04510           | 36         | 0.14288           |
| 28   | 80                                           | 0.25246           | 120        | 0.20927           | 114        | 0.29353           | 36                                           | 0.10742           | 119        | 0.04514           | 120        | 0.14350           |
| 29   | 61                                           | 0.25248           | 17         | 0.20927           | 113        | 0.29370           | 21                                           | 0.10761           | 36         | 0.04517           | 119        | 0.14351           |
| 30   | 49                                           | 0.25267           | 119        | 0.20929           | 42         | 0.29533           | 116                                          | 0.10767           | 21         | 0.04521           | 16         | 0.14353           |
| 31   | 96                                           | 0.25369           | 117        | 0.20930           | 21         | 0.29586           | 113                                          | 0.10821           | 44         | 0.06787           | 116        | 0.14359           |
| 32   | 4                                            | 0.25459           | 16         | 0.20933           | 119        | 0.29659           | 119                                          | 0.10915           | 109        | 0.06789           | 117        | 0.14504           |
| 33   | 136                                          | 0.25528           | 61         | 0.21345           | 136        | 0.34650           | 117                                          | 0.10969           | 20         | 0.06791           | 80         | 0.16344           |
| 34   | 2                                            | 0.25558           | 49         | 0.21347           | 138        | 0.34653           | 16                                           | 0.11108           | 14         | 0.06792           | 101        | 0.16347           |
| 35   | 138                                          | 0.25583           | 27         | 0.21390           | 2          | 0.34654           | 120                                          | 0.11309           | 134        | 0.06793           | 49         | 0.16370           |



|    |     |         |     |         |     |         |     |         |     |         |     |         |
|----|-----|---------|-----|---------|-----|---------|-----|---------|-----|---------|-----|---------|
| 36 | 70  | 0.29638 | 101 | 0.21394 | 4   | 0.34655 | 114 | 0.11360 | 131 | 0.06794 | 27  | 0.16370 |
| 37 | 88  | 0.41100 | 80  | 0.21406 | 33  | 0.47284 | 109 | 0.13268 | 9   | 0.06796 | 12  | 0.16408 |
| 38 | 85  | 0.41104 | 96  | 0.21408 | 50  | 0.47285 | 88  | 0.13309 | 106 | 0.06797 | 42  | 0.16436 |
| 39 | 20  | 0.41116 | 47  | 0.25043 | 54  | 0.47285 | 43  | 0.13493 | 43  | 0.06798 | 45  | 0.16561 |
| 40 | 131 | 0.41131 | 63  | 0.25048 | 52  | 0.47292 | 106 | 0.13639 | 88  | 0.06800 | 15  | 0.16597 |
| 41 | 8   | 0.41182 | 66  | 0.25055 | 20  | 0.49296 | 131 | 0.14148 | 8   | 0.06801 | 18  | 0.16612 |
| 42 | 43  | 0.41210 | 65  | 0.25066 | 109 | 0.49320 | 134 | 0.14205 | 85  | 0.06803 | 86  | 0.16616 |
| 43 | 44  | 0.41293 | 109 | 0.30035 | 44  | 0.49326 | 8   | 0.14229 | 80  | 0.07259 | 11  | 0.16617 |
| 44 | 134 | 0.41333 | 44  | 0.30038 | 9   | 0.49330 | 85  | 0.14254 | 49  | 0.07263 | 89  | 0.16617 |
| 45 | 109 | 0.41351 | 8   | 0.30043 | 106 | 0.49365 | 20  | 0.14284 | 27  | 0.07268 | 129 | 0.16617 |
| 46 | 14  | 0.41356 | 9   | 0.30051 | 88  | 0.49368 | 14  | 0.14290 | 96  | 0.07277 | 22  | 0.16618 |
| 47 | 9   | 0.41410 | 106 | 0.30054 | 85  | 0.49369 | 9   | 0.14460 | 61  | 0.07279 | 21  | 0.17045 |
| 48 | 106 | 0.41474 | 131 | 0.30064 | 134 | 0.49370 | 44  | 0.14479 | 101 | 0.07280 | 114 | 0.17187 |
| 49 | 99  | 0.44386 | 134 | 0.30071 | 131 | 0.49370 | 102 | 0.14694 | 67  | 0.08018 | 113 | 0.17364 |
| 50 | 100 | 0.44403 | 85  | 0.30073 | 43  | 0.49388 | 100 | 0.14719 | 124 | 0.08022 | 108 | 0.17633 |
| 51 | 91  | 0.44403 | 14  | 0.30079 | 14  | 0.49400 | 91  | 0.14885 | 79  | 0.08026 | 111 | 0.17769 |
| 52 | 82  | 0.44404 | 43  | 0.30087 | 8   | 0.49401 | 82  | 0.14894 | 68  | 0.08026 | 61  | 0.17863 |
| 53 | 102 | 0.44406 | 20  | 0.30091 | 77  | 0.49911 | 79  | 0.14930 | 94  | 0.08026 | 96  | 0.17863 |
| 54 | 77  | 0.44408 | 88  | 0.30092 | 100 | 0.50126 | 77  | 0.14934 | 103 | 0.08036 | 102 | 0.18031 |
| 55 | 66  | 0.44684 | 118 | 0.33477 | 65  | 0.50921 | 103 | 0.14969 | 1   | 0.09698 | 77  | 0.18038 |
| 56 | 48  | 0.47577 | 135 | 0.33590 | 64  | 0.50929 | 67  | 0.15033 | 135 | 0.09721 | 99  | 0.18346 |
| 57 | 97  | 0.47579 | 1   | 0.33592 | 23  | 0.50930 | 68  | 0.15034 | 118 | 0.09723 | 100 | 0.18541 |
| 58 | 34  | 0.47586 | 6   | 0.33611 | 59  | 0.50982 | 124 | 0.15051 | 6   | 0.09740 | 91  | 0.18542 |
| 59 | 78  | 0.47586 | 10  | 0.34308 | 99  | 0.51245 | 99  | 0.15056 | 99  | 0.10215 | 82  | 0.18545 |
| 60 | 57  | 0.47587 | 39  | 0.34318 | 91  | 0.51704 | 94  | 0.15141 | 77  | 0.10221 | 132 | 0.19710 |
| 61 | 28  | 0.47587 | 58  | 0.38804 | 128 | 0.52099 | 95  | 0.18106 | 102 | 0.10221 | 136 | 0.19862 |
| 62 | 95  | 0.47587 | 31  | 0.41132 | 70  | 0.52119 | 28  | 0.18330 | 100 | 0.10223 | 2   | 0.19862 |
| 63 | 59  | 0.47587 | 32  | 0.41151 | 82  | 0.52231 | 48  | 0.18403 | 91  | 0.10224 | 138 | 0.19862 |
| 64 | 56  | 0.47590 | 53  | 0.41423 | 105 | 0.53542 | 93  | 0.18406 | 82  | 0.10232 | 4   | 0.19864 |
| 65 | 81  | 0.47590 | 72  | 0.42405 | 48  | 0.54192 | 56  | 0.18476 | 56  | 0.11300 | 67  | 0.22199 |
| 66 | 105 | 0.47595 | 51  | 0.42408 | 32  | 0.54438 | 59  | 0.18485 | 28  | 0.11303 | 79  | 0.22199 |
| 67 | 93  | 0.47596 | 30  | 0.42444 | 53  | 0.54439 | 34  | 0.18522 | 97  | 0.11312 | 94  | 0.22199 |
| 68 | 53  | 0.47803 | 139 | 0.42451 | 31  | 0.54440 | 78  | 0.18541 | 57  | 0.11314 | 103 | 0.22199 |
| 69 | 6   | 0.47826 | 60  | 0.42513 | 58  | 0.54473 | 81  | 0.18546 | 59  | 0.11315 | 68  | 0.22200 |
| 70 | 118 | 0.47827 | 71  | 0.42640 | 56  | 0.54648 | 97  | 0.18552 | 95  | 0.11315 | 124 | 0.22200 |
| 71 | 31  | 0.47829 | 125 | 0.42697 | 57  | 0.54853 | 57  | 0.18553 | 48  | 0.11316 | 14  | 0.23253 |
| 72 | 135 | 0.47833 | 102 | 0.46092 | 78  | 0.54914 | 53  | 0.18973 | 105 | 0.11319 | 131 | 0.23254 |
| 73 | 32  | 0.47841 | 100 | 0.46099 | 102 | 0.54991 | 105 | 0.19043 | 93  | 0.11320 | 85  | 0.23254 |
| 74 | 1   | 0.47887 | 82  | 0.46100 | 34  | 0.55274 | 118 | 0.19073 | 78  | 0.11320 | 88  | 0.23254 |

|     |     |         |     |         |     |         |     |         |     |         |     |         |
|-----|-----|---------|-----|---------|-----|---------|-----|---------|-----|---------|-----|---------|
| 75  | 58  | 0.48052 | 77  | 0.46101 | 62  | 0.55306 | 58  | 0.19132 | 34  | 0.11321 | 106 | 0.23254 |
| 76  | 94  | 0.48351 | 91  | 0.46107 | 6   | 0.56025 | 32  | 0.19167 | 81  | 0.11321 | 44  | 0.23254 |
| 77  | 124 | 0.48362 | 99  | 0.46116 | 1   | 0.56050 | 1   | 0.19183 | 29  | 0.11895 | 134 | 0.23254 |
| 78  | 79  | 0.48363 | 79  | 0.46977 | 135 | 0.56063 | 6   | 0.19505 | 54  | 0.11901 | 9   | 0.23255 |
| 79  | 68  | 0.48367 | 103 | 0.46989 | 118 | 0.56089 | 135 | 0.19552 | 33  | 0.11902 | 20  | 0.23256 |
| 80  | 103 | 0.48375 | 94  | 0.46994 | 93  | 0.56188 | 31  | 0.19628 | 52  | 0.11905 | 43  | 0.23256 |
| 81  | 67  | 0.48376 | 124 | 0.46997 | 95  | 0.56323 | 15  | 0.19654 | 62  | 0.11906 | 109 | 0.23257 |
| 82  | 62  | 0.50051 | 68  | 0.47001 | 97  | 0.56328 | 86  | 0.19655 | 50  | 0.11909 | 8   | 0.23260 |
| 83  | 33  | 0.50053 | 67  | 0.47001 | 81  | 0.56363 | 18  | 0.19662 | 89  | 0.13052 | 93  | 0.23514 |
| 84  | 52  | 0.50113 | 62  | 0.47598 | 29  | 0.56384 | 129 | 0.19662 | 15  | 0.13057 | 34  | 0.24209 |
| 85  | 54  | 0.50114 | 33  | 0.47599 | 28  | 0.57064 | 132 | 0.19663 | 111 | 0.13061 | 105 | 0.25253 |
| 86  | 29  | 0.50114 | 29  | 0.47601 | 103 | 0.57563 | 38  | 0.19668 | 11  | 0.13062 | 28  | 0.25418 |
| 87  | 50  | 0.50116 | 52  | 0.47618 | 79  | 0.57576 | 89  | 0.19669 | 38  | 0.13063 | 70  | 0.28218 |
| 88  | 63  | 0.56303 | 50  | 0.47676 | 124 | 0.57644 | 22  | 0.19670 | 129 | 0.13064 | 128 | 0.29447 |
| 89  | 64  | 0.56456 | 54  | 0.47895 | 68  | 0.58014 | 45  | 0.19684 | 86  | 0.13068 | 62  | 0.30564 |
| 90  | 10  | 0.56599 | 81  | 0.48660 | 67  | 0.58038 | 108 | 0.19686 | 18  | 0.13070 | 118 | 0.30676 |
| 91  | 23  | 0.56781 | 28  | 0.48660 | 94  | 0.58412 | 111 | 0.19693 | 22  | 0.13071 | 58  | 0.30751 |
| 92  | 47  | 0.56849 | 34  | 0.48701 | 47  | 0.65840 | 11  | 0.19698 | 108 | 0.13071 | 135 | 0.30871 |
| 93  | 65  | 0.56916 | 78  | 0.48736 | 39  | 0.65890 | 52  | 0.20685 | 45  | 0.13072 | 6   | 0.30872 |
| 94  | 39  | 0.57213 | 95  | 0.48738 | 10  | 0.66083 | 62  | 0.20786 | 132 | 0.13074 | 1   | 0.30873 |
| 95  | 22  | 0.59553 | 105 | 0.48755 | 63  | 0.66108 | 33  | 0.20800 | 32  | 0.13724 | 53  | 0.31035 |
| 96  | 132 | 0.59553 | 59  | 0.48757 | 66  | 0.66286 | 50  | 0.20841 | 58  | 0.13729 | 32  | 0.31037 |
| 97  | 111 | 0.59555 | 57  | 0.48767 | 11  | 0.69813 | 54  | 0.21109 | 31  | 0.13737 | 31  | 0.31572 |
| 98  | 108 | 0.59563 | 93  | 0.48773 | 108 | 0.69815 | 29  | 0.21145 | 53  | 0.13737 | 47  | 0.31581 |
| 99  | 89  | 0.59563 | 48  | 0.48781 | 129 | 0.69818 | 23  | 0.24517 | 72  | 0.15194 | 10  | 0.31582 |
| 100 | 129 | 0.59566 | 97  | 0.48811 | 132 | 0.69820 | 66  | 0.24687 | 125 | 0.15199 | 65  | 0.31587 |
| 101 | 86  | 0.59570 | 56  | 0.48828 | 22  | 0.69821 | 47  | 0.24711 | 71  | 0.15206 | 66  | 0.31678 |
| 102 | 18  | 0.59570 | 69  | 0.58886 | 86  | 0.69822 | 39  | 0.24714 | 60  | 0.15403 | 63  | 0.32127 |
| 103 | 45  | 0.59573 | 127 | 0.58890 | 89  | 0.69823 | 64  | 0.24725 | 30  | 0.15418 | 38  | 0.32163 |
| 104 | 11  | 0.59574 | 15  | 0.59348 | 15  | 0.69864 | 72  | 0.24771 | 51  | 0.15444 | 64  | 0.32569 |
| 105 | 38  | 0.59574 | 132 | 0.59357 | 18  | 0.69904 | 63  | 0.24797 | 63  | 0.16854 | 39  | 0.32577 |
| 106 | 15  | 0.59583 | 3   | 0.59360 | 45  | 0.69910 | 60  | 0.24953 | 65  | 0.16854 | 23  | 0.32727 |
| 107 | 125 | 0.63088 | 137 | 0.59360 | 38  | 0.69937 | 10  | 0.24964 | 39  | 0.16860 | 60  | 0.33200 |
| 108 | 139 | 0.63088 | 111 | 0.59362 | 111 | 0.69937 | 65  | 0.25009 | 66  | 0.16860 | 125 | 0.33200 |
| 109 | 30  | 0.63089 | 5   | 0.59364 | 125 | 0.75367 | 30  | 0.25067 | 64  | 0.16861 | 50  | 0.34271 |
| 110 | 72  | 0.63096 | 45  | 0.59364 | 51  | 0.76444 | 125 | 0.25070 | 47  | 0.16864 | 30  | 0.34524 |
| 111 | 71  | 0.63097 | 38  | 0.59370 | 30  | 0.76525 | 5   | 0.25094 | 10  | 0.16868 | 51  | 0.34531 |
| 112 | 51  | 0.63102 | 18  | 0.59371 | 60  | 0.76603 | 51  | 0.25097 | 23  | 0.16877 | 72  | 0.34532 |
| 113 | 60  | 0.63138 | 129 | 0.59372 | 139 | 0.79569 | 137 | 0.25111 | 3   | 0.17441 | 71  | 0.34536 |

|     |     |         |     |         |     |         |     |         |     |         |     |         |
|-----|-----|---------|-----|---------|-----|---------|-----|---------|-----|---------|-----|---------|
| 114 | 137 | 0.73256 | 11  | 0.59372 | 3   | 0.79647 | 71  | 0.25112 | 137 | 0.17616 | 110 | 0.36584 |
| 115 | 5   | 0.73275 | 89  | 0.59374 | 137 | 0.79702 | 139 | 0.25113 | 139 | 0.17635 | 25  | 0.36711 |
| 116 | 3   | 0.73304 | 22  | 0.59377 | 5   | 0.79794 | 3   | 0.25114 | 5   | 0.17641 | 40  | 0.36711 |
| 117 | 24  | 0.86185 | 108 | 0.59377 | 24  | 0.88456 | 19  | 0.31343 | 74  | 0.20175 | 24  | 0.36714 |
| 118 | 130 | 0.86187 | 86  | 0.59379 | 25  | 0.88464 | 110 | 0.31343 | 69  | 0.24744 | 90  | 0.36721 |
| 119 | 19  | 0.86189 | 90  | 0.88537 | 110 | 0.88521 | 107 | 0.31348 | 87  | 0.27157 | 37  | 0.36959 |
| 120 | 37  | 0.86189 | 25  | 0.88538 | 40  | 0.88526 | 25  | 0.31362 | 25  | 0.27164 | 130 | 0.37761 |
| 121 | 90  | 0.86191 | 24  | 0.88539 | 90  | 0.93657 | 40  | 0.31363 | 19  | 0.27360 | 107 | 0.38049 |
| 122 | 87  | 0.86192 | 110 | 0.88540 | 107 | 0.94726 | 130 | 0.31368 | 40  | 0.27376 | 13  | 0.38051 |
| 123 | 107 | 0.86194 | 37  | 0.88540 | 133 | 0.98380 | 24  | 0.31369 | 110 | 0.27396 | 133 | 0.38133 |
| 124 | 133 | 0.86196 | 13  | 0.88541 | 74  | 1.11262 | 13  | 0.31381 | 130 | 0.27400 | 19  | 0.38136 |
| 125 | 40  | 0.86197 | 130 | 0.88543 | 98  | 1.11280 | 133 | 0.31384 | 24  | 0.27405 | 5   | 0.38218 |
| 126 | 110 | 0.86199 | 87  | 0.88544 | 123 | 1.11291 | 37  | 0.31387 | 90  | 0.27410 | 137 | 0.38219 |
| 127 | 25  | 0.86200 | 19  | 0.88547 | 84  | 1.11299 | 90  | 0.31391 | 13  | 0.27411 | 3   | 0.38220 |
| 128 | 13  | 0.86202 | 40  | 0.88549 | 127 | 1.12955 | 87  | 0.31412 | 133 | 0.27419 | 74  | 0.38306 |
| 129 | 84  | 1.12191 | 107 | 0.88555 | 35  | 1.18991 | 73  | 0.34821 | 37  | 0.27428 | 123 | 0.38317 |
| 130 | 98  | 1.12200 | 133 | 0.88564 | 69  | 1.19625 | 75  | 0.36921 | 107 | 0.27441 | 98  | 0.38319 |
| 131 | 123 | 1.12201 | 74  | 1.16725 | 55  | 1.19795 | 74  | 0.37972 | 123 | 0.34644 | 139 | 0.40665 |
| 132 | 74  | 1.12202 | 98  | 1.16736 | 37  | 1.30014 | 84  | 0.37986 | 84  | 0.34691 | 84  | 0.41240 |
| 133 | 35  | 1.16650 | 84  | 1.16743 | 130 | 1.30524 | 98  | 0.38016 | 98  | 0.35145 | 127 | 0.46686 |
| 134 | 127 | 1.16663 | 123 | 1.16750 | 72  | 1.35729 | 123 | 0.38033 | 35  | 0.38075 | 69  | 0.46688 |
| 135 | 55  | 1.16673 | 35  | 1.21006 | 71  | 1.35784 | 55  | 0.41288 | 127 | 0.38132 | 35  | 0.46743 |
| 136 | 69  | 1.16677 | 55  | 1.21006 | 126 | 1.35852 | 69  | 0.41301 | 55  | 0.38226 | 75  | 0.46773 |
| 137 | 126 | 1.22921 | 126 | 1.31044 | 75  | 1.35860 | 35  | 0.41313 | 75  | 0.42086 | 55  | 0.47081 |
| 138 | 75  | 1.22923 | 73  | 1.31049 | 73  | 1.35925 | 127 | 0.41339 | 73  | 0.42094 | 73  | 0.47755 |
| 139 | 73  | 1.22931 | 75  | 1.31050 | 87  | 1.37097 | 126 | 0.47624 | 126 | 0.42098 | 126 | 0.58851 |

1 **Table S2.** Total energy rankings for each potential of  $\text{Li}_2\text{TiA}_3$  and structural information for Li-Ti  
2 configurations. Energy differences are presented per formula unit. Details on the Structure ID  
3 can be found in Table S1.

4

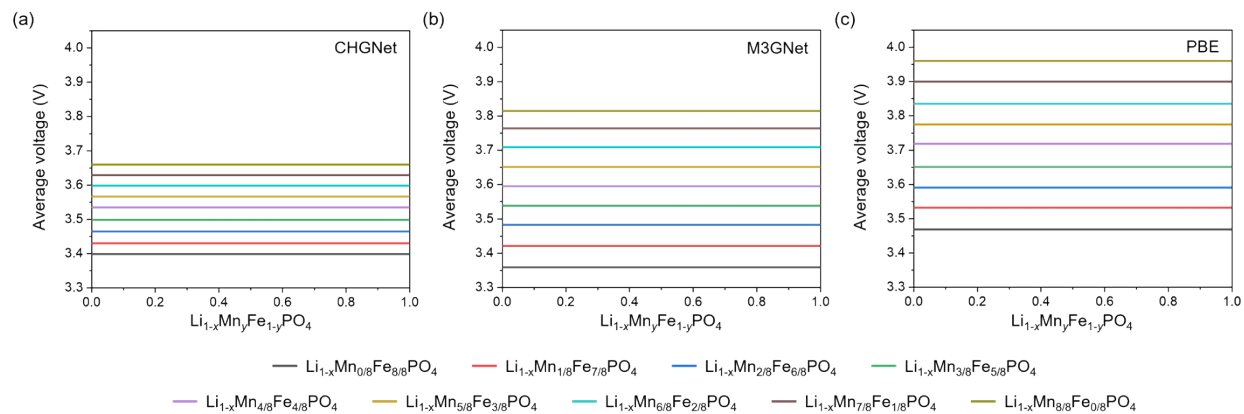

1

2 **Fig. S3.** Calculated average voltages based on the  $\text{LiMn}_y\text{Fe}_{1-y}\text{PO}_4$  and  $\text{Mn}_y\text{Fe}_{1-y}\text{PO}_4$  of (a)  
 3 CHGNet, (b) M3GNet and (c) PBE results.

4

| $x = 0.25$        |               | CHGNet               |               | M3GNet               |               | PBE                  |                   | $x = 0.75$    |                      | CHGNet        |                      | M3GNet        |                      | PBE           |                      |
|-------------------|---------------|----------------------|---------------|----------------------|---------------|----------------------|-------------------|---------------|----------------------|---------------|----------------------|---------------|----------------------|---------------|----------------------|
| Rank<br>(eV/f.u.) | Struct.<br>ID | Energy<br>difference | Struct.<br>ID | Energy<br>difference | Struct.<br>ID | Energy<br>difference | Rank<br>(eV/f.u.) | Struct.<br>ID | Energy<br>difference | Struct.<br>ID | Energy<br>difference | Struct.<br>ID | Energy<br>difference | Struct.<br>ID | Energy<br>difference |
| 1                 | <b>3</b>      | 0.00000              | <i>2</i>      | 0.00000              | 26            | 0.00000              | 1                 | <b>24</b>     | 0.00000              | <i>25</i>     | 0.00000              | <i>2</i>      | 0.00000              | <i>2</i>      | 0.00000              |
| 2                 | <b>16</b>     | 0.00050              | <i>9</i>      | 0.00072              | <i>21</i>     | 0.00005              | 2                 | <b>8</b>      | 0.00002              | <i>26</i>     | 0.00001              | <i>26</i>     | 0.00008              | <i>26</i>     | 0.00008              |
| 3                 | <b>17</b>     | 0.00070              | <i>6</i>      | 0.00159              | <i>6</i>      | 0.00242              | 3                 | <b>25</b>     | 0.00004              | <i>2</i>      | 0.00006              | <i>3</i>      | 0.00008              | <i>3</i>      | 0.00008              |
| 4                 | <b>2</b>      | 0.00084              | <i>3</i>      | 0.00209              | 28            | 0.00251              | 4                 | <b>26</b>     | 0.00004              | <i>3</i>      | 0.00020              | <i>27</i>     | 0.00009              | <i>27</i>     | 0.00009              |
| 5                 | <b>13</b>     | 0.00236              | <i>21</i>     | 0.00357              | <i>3</i>      | 0.00343              | 5                 | <b>16</b>     | 0.00138              | <i>24</i>     | 0.00023              | <i>25</i>     | 0.00010              | <i>25</i>     | 0.00010              |
| 6                 | <b>14</b>     | 0.00259              | <i>13</i>     | 0.00504              | <b>17</b>     | 0.00418              | 6                 | <b>27</b>     | 0.00196              | <i>27</i>     | 0.00031              | <i>9</i>      | 0.00011              | <i>9</i>      | 0.00011              |
| 7                 | 23            | 0.00265              | 14            | 0.00512              | 11            | 0.00943              | 7                 | <b>9</b>      | 0.00205              | <b>8</b>      | 0.00063              | <i>24</i>     | 0.00013              | <i>24</i>     | 0.00013              |
| 8                 | <b>5</b>      | 0.00474              | <b>17</b>     | 0.00625              | <b>8</b>      | 0.00944              | 8                 | <b>3</b>      | 0.00212              | <b>12</b>     | 0.00127              | <b>8</b>      | 0.00020              | <b>8</b>      | 0.00020              |
| 9                 | <b>21</b>     | 0.00501              | 16            | 0.00655              | <b>24</b>     | 0.00944              | 9                 | <b>7</b>      | 0.00335              | <b>9</b>      | 0.00135              | <b>15</b>     | 0.00221              | <b>15</b>     | 0.00221              |
| 10                | 20            | 0.00506              | 10            | 0.00669              | <b>19</b>     | 0.00946              | 10                | <b>19</b>     | 0.00339              | <b>7</b>      | 0.00139              | <b>16</b>     | 0.00224              | <b>16</b>     | 0.00224              |
| 11                | 4             | 0.00510              | <b>26</b>     | 0.00712              | <i>2</i>      | 0.01242              | 11                | <b>13</b>     | 0.00340              | <b>16</b>     | 0.00139              | <b>19</b>     | 0.00225              | <b>19</b>     | 0.00225              |
| 12                | 27            | 0.00513              | <b>28</b>     | 0.00879              | 4             | 0.01420              | 12                | <b>2</b>      | 0.00375              | <b>20</b>     | 0.00143              | <b>20</b>     | 0.00225              | <b>20</b>     | 0.00225              |
| 13                | <b>26</b>     | 0.00517              | <b>8</b>      | 0.01010              | 20            | 0.01425              | 13                | <b>6</b>      | 0.00505              | <b>6</b>      | 0.00146              | <b>6</b>      | 0.00226              | <b>6</b>      | 0.00226              |
| 14                | 10            | 0.00555              | <b>11</b>     | 0.01119              | 27            | 0.01425              | 14                | <b>20</b>     | 0.00514              | <b>13</b>     | 0.00148              | <b>7</b>      | 0.00226              | <b>7</b>      | 0.00226              |
| 15                | 22            | 0.00601              | 15            | 0.01142              | 5             | 0.01426              | 15                | <b>12</b>     | 0.00570              | <b>19</b>     | 0.00181              | <b>13</b>     | 0.00228              | <b>13</b>     | 0.00228              |
| 16                | 9             | 0.00612              | 5             | 0.01344              | <i>9</i>      | 0.01451              | 16                | <b>15</b>     | 0.00692              | <b>15</b>     | 0.00182              | <b>12</b>     | 0.00239              | <b>12</b>     | 0.00239              |
| 17                | <b>28</b>     | 0.00664              | 23            | 0.01399              | 22            | 0.01452              | 17                | 18            | 0.00743              | 1             | 0.00242              | 14            | 0.01884              | 14            | 0.01884              |
| 18                | <b>6</b>      | 0.00670              | 4             | 0.01405              | 10            | 0.01453              | 18                | 10            | 0.00751              | 28            | 0.00255              | 28            | 0.01885              | 28            | 0.01885              |
| 19                | <b>11</b>     | 0.01209              | <b>22</b>     | 0.01481              | <i>13</i>     | 0.01454              | 19                | 14            | 0.01027              | 18            | 0.00283              | 23            | 0.01887              | 23            | 0.01887              |
| 20                | <b>24</b>     | 0.01228              | 1             | 0.01619              | 23            | 0.01458              | 20                | 23            | 0.01029              | 21            | 0.00294              | 1             | 0.01887              | 1             | 0.01887              |
| 21                | 8             | 0.01336              | 20            | 0.01675              | <b>14</b>     | 0.01460              | 21                | 1             | 0.01042              | 23            | 0.00294              | 10            | 0.02534              | 10            | 0.02534              |
| 22                | 1             | 0.01573              | 24            | 0.01849              | <b>16</b>     | 0.01600              | 22                | 28            | 0.01044              | 14            | 0.00296              | 21            | 0.02534              | 21            | 0.02534              |
| 23                | 15            | 0.01582              | 27            | 0.01868              | 18            | 0.03469              | 23                | 21            | 0.01375              | 5             | 0.00304              | 5             | 0.02536              | 5             | 0.02536              |
| 24                | <b>19</b>     | 0.01743              | <b>19</b>     | 0.01891              | 7             | 0.03470              | 24                | 5             | 0.01927              | 10            | 0.00351              | 18            | 0.02544              | 18            | 0.02544              |
| 25                | 18            | 0.03401              | 12            | 0.02074              | 25            | 0.03475              | 25                | 22            | 0.03047              | 22            | 0.02516              | 4             | 0.05920              | 4             | 0.05920              |
| 26                | 7             | 0.03406              | 18            | 0.02743              | 1             | 0.04102              | 26                | 17            | 0.03050              | 17            | 0.02518              | 22            | 0.05923              | 22            | 0.05923              |
| 27                | 25            | 0.03406              | 7             | 0.03071              | 15            | 0.04108              | 27                | 11            | 0.03833              | 4             | 0.02525              | 17            | 0.05923              | 17            | 0.05923              |
| 28                | 12            | 0.03406              | 25            | 0.03094              | 12            | 0.06784              | 28                | 4             | 0.04151              | 11            | 0.02539              | 11            | 0.05930              | 11            | 0.05930              |

2 **Table S3.** Total energy rank of  $\text{Li}_{1-x}\text{FePO}_4$  ( $x = 0.25$  and  $x = 0.75$ ) derived from the combination of  
3 vacancy contents ( $x$ ). Structures within the lowest 10% energy range from CHGNet are marked in  
4 **bold black** text, and those from M3GNet are marked in *red italic* text. Differences in results due  
5 to calculation and boundary conditions in DFT calculations (**highlighted orange**) are assumed to  
6 be less than 0.01 eV per formula unit (f.u.).

| $x = 0.375$    |            | CHGNet            |            | M3GNet            |            | PBE               |                | $x = 0.375$ |                   | CHGNet     |                   | M3GNet     |                   | PBE        |                   |
|----------------|------------|-------------------|------------|-------------------|------------|-------------------|----------------|-------------|-------------------|------------|-------------------|------------|-------------------|------------|-------------------|
| Rank (eV/f.u.) | Struct. ID | Energy difference | Struct. ID | Energy difference | Struct. ID | Energy difference | Rank (eV/f.u.) | Struct. ID  | Energy difference | Struct. ID | Energy difference | Struct. ID | Energy difference | Struct. ID | Energy difference |
| 1              | <b>35</b>  | 0.00000           | <i>35</i>  | 0.00000           | <b>20</b>  | 0.00000           | 29             | 43          | 0.01263           | <b>46</b>  | 0.01706           | 7          | 0.01040           |            |                   |
| 2              | <b>56</b>  | 0.00011           | <i>24</i>  | 0.00293           | <b>23</b>  | 0.00003           | 30             | 44          | 0.01267           | <b>4</b>   | 0.01839           | 48         | 0.01042           |            |                   |
| 3              | <b>55</b>  | 0.00015           | <i>34</i>  | 0.00352           | <b>49</b>  | 0.00004           | 31             | 30          | 0.01273           | 14         | 0.01851           | <i>34</i>  | 0.01043           |            |                   |
| 4              | <b>34</b>  | 0.00065           | <i>12</i>  | 0.00372           | <b>33</b>  | 0.00004           | 32             | 31          | 0.01301           | 28         | 0.02295           | 9          | 0.01043           |            |                   |
| 5              | <b>21</b>  | 0.00125           | <i>56</i>  | 0.00497           | <b>39</b>  | 0.00004           | 33             | <b>15</b>   | 0.02634           | 42         | 0.02409           | <i>37</i>  | 0.01043           |            |                   |
| 6              | <b>19</b>  | 0.00154           | <i>21</i>  | 0.00515           | <b>6</b>   | 0.00105           | 34             | <b>29</b>   | 0.02651           | <b>29</b>  | 0.02491           | 38         | 0.01043           |            |                   |
| 7              | <b>52</b>  | 0.00170           | <i>36</i>  | 0.00594           | <b>13</b>  | 0.00106           | 35             | 45          | 0.02860           | <b>15</b>  | 0.02496           | <i>24</i>  | 0.01045           |            |                   |
| 8              | <b>36</b>  | 0.00176           | <i>25</i>  | 0.00642           | <b>32</b>  | 0.00109           | 36             | 40          | 0.02960           | <b>32</b>  | 0.02514           | 14         | 0.01045           |            |                   |
| 9              | <b>4</b>   | 0.00409           | <i>10</i>  | 0.00692           | <b>29</b>  | 0.00161           | 37             | <b>23</b>   | 0.02977           | <b>23</b>  | 0.02624           | <i>25</i>  | 0.01050           |            |                   |
| 10             | <b>50</b>  | 0.00444           | <i>37</i>  | 0.00698           | <b>15</b>  | 0.00171           | 38             | 8           | 0.02978           | 5          | 0.02740           | 43         | 0.01260           |            |                   |
| 11             | 7          | 0.00523           | 9          | 0.00732           | <b>55</b>  | 0.00230           | 39             | 47          | 0.03033           | 47         | 0.02744           | 30         | 0.01265           |            |                   |
| 12             | 28         | 0.00523           | <b>52</b>  | 0.00756           | <b>50</b>  | 0.00235           | 40             | <b>39</b>   | 0.03035           | 27         | 0.02856           | 44         | 0.01269           |            |                   |
| 13             | 14         | 0.00532           | 20         | 0.00788           | <i>35</i>  | 0.00235           | 41             | <b>32</b>   | 0.03254           | 22         | 0.02956           | 31         | 0.02204           |            |                   |
| 14             | <b>51</b>  | 0.00624           | <b>50</b>  | 0.00872           | <i>56</i>  | 0.00343           | 42             | 27          | 0.03375           | <b>33</b>  | 0.02961           | 45         | 0.02557           |            |                   |
| 15             | 24         | 0.00636           | 7          | 0.01044           | <b>1</b>   | 0.00422           | 43             | <b>6</b>    | 0.03416           | 8          | 0.03055           | 8          | 0.02754           |            |                   |
| 16             | <b>12</b>  | 0.00647           | <b>19</b>  | 0.01073           | <b>2</b>   | 0.00430           | 44             | <b>13</b>   | 0.03417           | <b>49</b>  | 0.03212           | 47         | 0.02762           |            |                   |
| 17             | 2          | 0.00711           | 51         | 0.01101           | <b>3</b>   | 0.00432           | 45             | 18          | 0.03561           | <b>13</b>  | 0.03249           | 42         | 0.02764           |            |                   |
| 18             | 37         | 0.00722           | 2          | 0.01233           | <i>12</i>  | 0.00490           | 46             | 11          | 0.03746           | 40         | 0.03465           | 22         | 0.03886           |            |                   |
| 19             | <b>3</b>   | 0.00745           | <b>55</b>  | 0.01265           | <b>19</b>  | 0.00595           | 47             | 5           | 0.03749           | <b>39</b>  | 0.03517           | 27         | 0.03986           |            |                   |
| 20             | 1          | 0.00788           | 3          | 0.01266           | <i>36</i>  | 0.00596           | 48             | <b>33</b>   | 0.03878           | 45         | 0.03532           | 40         | 0.04693           |            |                   |
| 21             | <b>16</b>  | 0.00877           | 48         | 0.01277           | <b>52</b>  | 0.00597           | 49             | 42          | 0.03915           | <b>6</b>   | 0.03567           | 5          | 0.06351           |            |                   |
| 22             | 48         | 0.00941           | <b>1</b>   | 0.01318           | <i>21</i>  | 0.00602           | 50             | 22          | 0.03938           | 11         | 0.03640           | 41         | 0.06353           |            |                   |
| 23             | 9          | 0.00943           | <b>16</b>  | 0.01470           | <b>51</b>  | 0.00603           | 51             | <b>49</b>   | 0.04096           | 41         | 0.03855           | 53         | 0.06354           |            |                   |
| 24             | 25         | 0.01007           | 31         | 0.01618           | <i>10</i>  | 0.00608           | 52             | 41          | 0.05410           | 17         | 0.04003           | 18         | 0.06481           |            |                   |
| 25             | 38         | 0.01008           | 38         | 0.01627           | <b>4</b>   | 0.00696           | 53             | 53          | 0.05449           | 18         | 0.04050           | 17         | 0.06542           |            |                   |
| 26             | <b>10</b>  | 0.01142           | 30         | 0.01666           | <b>16</b>  | 0.00801           | 54             | 17          | 0.05552           | 26         | 0.04102           | 26         | 0.07499           |            |                   |
| 27             | <b>20</b>  | 0.01164           | 43         | 0.01667           | <b>46</b>  | 0.00806           | 55             | 54          | 0.05665           | 54         | 0.04989           | 11         | 0.07556           |            |                   |
| 28             | <b>46</b>  | 0.01239           | 44         | 0.01690           | <b>28</b>  | 0.01038           | 56             | 26          | 0.06108           | 53         | 0.05637           | 54         | 0.11706           |            |                   |

1 **Table S4.** Total energy rank of  $\text{Li}_{1-x}\text{FePO}_4$  ( $x = 0.375$ ) derived from the combination of vacancy  
2 contents ( $x$ ). Structures within the lowest 10% energy range from CHGNet are marked in **bold**  
3 **black** text, and those from M3GNet are marked in *red italic* text. Differences in results due to  
4 calculation and boundary conditions in DFT calculations (**highlighted orange**) are assumed to be  
5 less than 0.01 eV per formula unit (f.u.).

6

7

| $x = 0.5$      |            | CHGNet            |            | M3GNet            |            | PBE               |                | $x = 0.5$  |                   | CHGNet     |                   | M3GNet     |                   | PBE        |                   |
|----------------|------------|-------------------|------------|-------------------|------------|-------------------|----------------|------------|-------------------|------------|-------------------|------------|-------------------|------------|-------------------|
| Rank (eV/f.u.) | Struct. ID | Energy difference | Struct. ID | Energy difference | Struct. ID | Energy difference | Rank (eV/f.u.) | Struct. ID | Energy difference |
| 1              | <b>15</b>  | 0.00000           | <i>24</i>  | 0.00000           | <i>56</i>  | 0.00000           | 36             | 16         | 0.03944           | 14         | 0.02188           | 38         | 0.04522           |            |                   |
| 2              | <b>1</b>   | 0.00001           | <i>66</i>  | 0.00147           | <i>66</i>  | 0.00183           | 37             | 51         | 0.03945           | 39         | 0.02408           | 9          | 0.05411           |            |                   |
| 3              | <b>5</b>   | 0.00214           | <i>29</i>  | 0.00194           | <i>54</i>  | 0.00184           | 38             | 23         | 0.04004           | 33         | 0.02414           | 65         | 0.06237           |            |                   |
| 4              | <b>8</b>   | 0.00285           | <i>8</i>   | 0.00293           | <i>36</i>  | 0.00188           | 39             | 27         | 0.04059           | 20         | 0.02448           | 32         | 0.06237           |            |                   |
| 5              | <b>56</b>  | 0.00342           | <i>5</i>   | 0.00315           | <b>15</b>  | 0.00208           | 40             | 14         | 0.04078           | 19         | 0.02470           | 53         | 0.06238           |            |                   |
| 6              | <b>47</b>  | 0.00629           | <i>42</i>  | 0.00318           | <i>17</i>  | 0.00290           | 41             | 20         | 0.04081           | 65         | 0.02477           | 18         | 0.06238           |            |                   |
| 7              | <b>42</b>  | 0.00635           | <i>70</i>  | 0.00358           | <i>63</i>  | 0.00293           | 42             | 44         | 0.04112           | 26         | 0.02519           | 33         | 0.06238           |            |                   |
| 8              | <b>70</b>  | 0.00779           | <i>56</i>  | 0.00372           | <i>70</i>  | 0.00390           | 43             | 65         | 0.04115           | 18         | 0.02542           | 19         | 0.06240           |            |                   |
| 9              | <b>66</b>  | 0.00919           | <i>54</i>  | 0.00399           | <i>5</i>   | 0.00437           | 44             | 59         | 0.04171           | 46         | 0.02554           | 68         | 0.06244           |            |                   |
| 10             | <b>35</b>  | 0.01123           | <i>1</i>   | 0.00485           | <i>8</i>   | 0.00442           | 45             | 39         | 0.04176           | 58         | 0.02560           | 39         | 0.06244           |            |                   |
| 11             | <b>36</b>  | 0.01309           | <i>36</i>  | 0.00566           | <b>35</b>  | 0.00955           | 46             | 46         | 0.04229           | 31         | 0.02576           | 69         | 0.06253           |            |                   |
| 12             | <b>24</b>  | 0.01352           | <i>47</i>  | 0.00791           | <i>47</i>  | 0.01014           | 47             | 52         | 0.04246           | 57         | 0.02611           | 20         | 0.06433           |            |                   |
| 13             | <b>63</b>  | 0.01396           | <i>17</i>  | 0.00821           | <i>42</i>  | 0.01024           | 48             | 68         | 0.04310           | 38         | 0.02636           | 51         | 0.06434           |            |                   |
| 14             | <b>17</b>  | 0.01427           | <i>63</i>  | 0.00914           | <i>1</i>   | 0.01281           | 49             | 53         | 0.04324           | 59         | 0.02636           | 25         | 0.06435           |            |                   |
| 15             | <b>54</b>  | 0.01430           | <i>35</i>  | 0.00915           | <i>29</i>  | 0.01618           | 50             | 45         | 0.04371           | 60         | 0.02646           | 31         | 0.06435           |            |                   |
| 16             | 29         | 0.01809           | <i>15</i>  | 0.01009           | 60         | 0.01633           | 51             | 69         | 0.04404           | 51         | 0.02695           | 46         | 0.06438           |            |                   |
| 17             | 60         | 0.02357           | 37         | 0.01611           | <i>24</i>  | 0.01943           | 52             | 30         | 0.04520           | 6          | 0.02722           | 11         | 0.06439           |            |                   |
| 18             | 31         | 0.02372           | 34         | 0.01614           | 58         | 0.02002           | 53             | 6          | 0.04603           | 55         | 0.02737           | 57         | 0.06441           |            |                   |
| 19             | 4          | 0.02912           | 67         | 0.01624           | 62         | 0.02347           | 54             | 33         | 0.04693           | 48         | 0.02768           | 59         | 0.06441           |            |                   |
| 20             | 62         | 0.03183           | 25         | 0.01664           | 34         | 0.02349           | 55             | 58         | 0.04830           | 49         | 0.02882           | 13         | 0.06442           |            |                   |
| 21             | 34         | 0.03185           | 16         | 0.01678           | 16         | 0.02350           | 56             | 3          | 0.05020           | 68         | 0.02895           | 12         | 0.06442           |            |                   |
| 22             | 67         | 0.03263           | 44         | 0.01758           | 4          | 0.02560           | 57             | 7          | 0.05030           | 53         | 0.02934           | 26         | 0.06445           |            |                   |
| 23             | 9          | 0.03265           | 22         | 0.01770           | 48         | 0.03086           | 58             | 32         | 0.05041           | 13         | 0.03012           | 28         | 0.06487           |            |                   |
| 24             | 19         | 0.03398           | 27         | 0.01787           | 41         | 0.03091           | 59             | 2          | 0.05102           | 7          | 0.03181           | 6          | 0.06492           |            |                   |
| 25             | 18         | 0.03403           | 23         | 0.01794           | 44         | 0.03096           | 60             | 57         | 0.05135           | 52         | 0.03276           | 43         | 0.06496           |            |                   |
| 26             | 64         | 0.03436           | 32         | 0.01837           | 55         | 0.03145           | 61             | 26         | 0.05148           | 45         | 0.03292           | 21         | 0.06498           |            |                   |
| 27             | 13         | 0.03480           | 64         | 0.01882           | 67         | 0.03150           | 62             | 38         | 0.05292           | 21         | 0.03439           | 40         | 0.07161           |            |                   |
| 28             | 12         | 0.03488           | 30         | 0.01899           | 37         | 0.03166           | 63             | 40         | 0.05305           | 50         | 0.03449           | 45         | 0.07162           |            |                   |
| 29             | 11         | 0.03489           | 4          | 0.01942           | 30         | 0.03837           | 64             | 25         | 0.05350           | 28         | 0.03486           | 14         | 0.07166           |            |                   |
| 30             | 55         | 0.03592           | 40         | 0.01987           | 27         | 0.03842           | 65             | 28         | 0.05960           | 43         | 0.03545           | 2          | 0.07264           |            |                   |
| 31             | 22         | 0.03608           | 69         | 0.01991           | 49         | 0.03842           | 66             | 21         | 0.06225           | 12         | 0.03603           | 3          | 0.07266           |            |                   |
| 32             | 41         | 0.03622           | 9          | 0.02045           | 23         | 0.03843           | 67             | 43         | 0.06624           | 3          | 0.04177           | 7          | 0.07267           |            |                   |
| 33             | 48         | 0.03709           | 11         | 0.02111           | 22         | 0.03845           | 68             | 50         | 0.06630           | 2          | 0.04191           | 50         | 0.08640           |            |                   |
| 34             | 37         | 0.03711           | 41         | 0.02146           | 52         | 0.04330           | 69             | 61         | 0.07831           | 61         | 0.04280           | 61         | 0.14306           |            |                   |
| 35             | 49         | 0.03712           | 62         | 0.02183           | 64         | 0.04521           | 70             | 10         | 0.09159           | 10         | 0.06442           | 10         | 0.14310           |            |                   |

1 **Table S5.** Total energy rank of  $\text{Li}_{1-x}\text{FePO}_4$  (0.5) derived from the combination of vacancy contents

2 (x). Structures within the lowest 10% energy range from CHGNet are marked in **bold black** text,

3 and those from M3GNet are marked in *red italic* text. Differences in results due to calculation

1 and boundary conditions in DFT calculations (highlighted orange) are assumed to be less than  
2 0.01 eV per formula unit (f.u.).

3

4

5

6



| $x = 0.625$    |            | CHGNet            |            | M3GNet            |            | PBE               |                | $x = 0.625$ |                   | CHGNet     |                   | M3GNet     |                   | PBE        |                   |
|----------------|------------|-------------------|------------|-------------------|------------|-------------------|----------------|-------------|-------------------|------------|-------------------|------------|-------------------|------------|-------------------|
| Rank (eV/f.u.) | Struct. ID | Energy difference | Struct. ID | Energy difference | Struct. ID | Energy difference | Rank (eV/f.u.) | Struct. ID  | Energy difference | Struct. ID | Energy difference | Struct. ID | Energy difference | Struct. ID | Energy difference |
| 1              | <b>47</b>  | 0.00000           | <i>22</i>  | 0.00000           | <i>22</i>  | 0.00000           | 29             | 56          | 0.01314           | 53         | 0.00787           | <i>56</i>  | 0.02052           |            |                   |
| 2              | <b>53</b>  | 0.00369           | <i>56</i>  | 0.00010           | <b>1</b>   | 0.00000           | 30             | <b>45</b>   | 0.01465           | <b>20</b>  | 0.00921           | <i>29</i>  | 0.02341           |            |                   |
| 3              | <b>55</b>  | 0.00433           | <i>54</i>  | 0.00019           | <b>7</b>   | 0.00002           | 31             | 37          | 0.01736           | <b>11</b>  | 0.00936           | <i>32</i>  | 0.02343           |            |                   |
| 4              | <b>21</b>  | 0.00443           | <i>32</i>  | 0.00104           | <b>2</b>   | 0.00005           | 32             | 23          | 0.01816           | 36         | 0.01098           | 33         | 0.02714           |            |                   |
| 5              | <b>54</b>  | 0.00464           | <i>45</i>  | 0.00105           | <i>6</i>   | 0.00519           | 33             | 42          | 0.02826           | 49         | 0.01434           | 35         | 0.04554           |            |                   |
| 6              | <b>13</b>  | 0.00530           | <i>47</i>  | 0.00128           | <b>5</b>   | 0.00521           | 34             | 25          | 0.02829           | 12         | 0.01500           | 30         | 0.04563           |            |                   |
| 7              | <b>32</b>  | 0.00543           | <i>6</i>   | 0.00128           | <i>47</i>  | 0.00521           | 35             | 15          | 0.02964           | 30         | 0.01500           | 42         | 0.04563           |            |                   |
| 8              | <b>1</b>   | 0.00555           | <i>50</i>  | 0.00169           | <b>21</b>  | 0.00522           | 36             | 4           | 0.03119           | 10         | 0.01531           | 34         | 0.04564           |            |                   |
| 9              | <b>22</b>  | 0.00592           | <i>27</i>  | 0.00183           | <b>26</b>  | 0.00996           | 37             | 16          | 0.03131           | 25         | 0.01537           | 10         | 0.04858           |            |                   |
| 10             | <b>41</b>  | 0.00633           | 29         | 0.00188           | <b>43</b>  | 0.00996           | 38             | 28          | 0.03328           | 17         | 0.01542           | 18         | 0.04858           |            |                   |
| 11             | <b>5</b>   | 0.00646           | <b>43</b>  | 0.00205           | <i>45</i>  | 0.00997           | 39             | 44          | 0.03431           | 44         | 0.01722           | 8          | 0.04859           |            |                   |
| 12             | <b>26</b>  | 0.00715           | <b>14</b>  | 0.00209           | <b>20</b>  | 0.00998           | 40             | 35          | 0.03509           | 8          | 0.01760           | 15         | 0.04861           |            |                   |
| 13             | <b>7</b>   | 0.00727           | 23         | 0.00210           | <i>50</i>  | 0.00998           | 41             | 18          | 0.03601           | 35         | 0.02018           | 44         | 0.04862           |            |                   |
| 14             | <b>6</b>   | 0.00871           | <b>48</b>  | 0.00211           | <b>13</b>  | 0.00999           | 42             | 30          | 0.03601           | 15         | 0.02020           | 17         | 0.04863           |            |                   |
| 15             | <b>27</b>  | 0.00909           | <b>13</b>  | 0.00232           | <b>11</b>  | 0.00999           | 43             | 8           | 0.03717           | 34         | 0.02050           | 25         | 0.04863           |            |                   |
| 16             | <b>9</b>   | 0.00919           | 33         | 0.00234           | <i>27</i>  | 0.00999           | 44             | 10          | 0.03724           | 42         | 0.02065           | 49         | 0.04864           |            |                   |
| 17             | <b>29</b>  | 0.00921           | 38         | 0.00238           | <b>19</b>  | 0.01000           | 45             | 12          | 0.03852           | 28         | 0.02119           | 24         | 0.05904           |            |                   |
| 18             | <b>2</b>   | 0.00927           | 37         | 0.00241           | <b>9</b>   | 0.01003           | 46             | 49          | 0.03957           | 39         | 0.02378           | 12         | 0.05904           |            |                   |
| 19             | <b>11</b>  | 0.00934           | <b>5</b>   | 0.00255           | <b>14</b>  | 0.01004           | 47             | 24          | 0.03958           | 31         | 0.02386           | 28         | 0.05904           |            |                   |
| 20             | <b>33</b>  | 0.00937           | <b>21</b>  | 0.00261           | <b>48</b>  | 0.01005           | 48             | 34          | 0.04142           | 4          | 0.02404           | 51         | 0.05978           |            |                   |
| 21             | <b>50</b>  | 0.00937           | <b>26</b>  | 0.00304           | <b>23</b>  | 0.01005           | 49             | 17          | 0.04182           | 52         | 0.02412           | 16         | 0.09468           |            |                   |
| 22             | <b>36</b>  | 0.00939           | <b>9</b>   | 0.00542           | <b>53</b>  | 0.01389           | 50             | 51          | 0.04186           | 24         | 0.02634           | 4          | 0.09535           |            |                   |
| 23             | <b>48</b>  | 0.00941           | <b>19</b>  | 0.00565           | <b>55</b>  | 0.01390           | 51             | 3           | 0.04528           | 18         | 0.02648           | 39         | 0.09985           |            |                   |
| 24             | <b>38</b>  | 0.01090           | 41         | 0.00579           | <i>54</i>  | 0.01396           | 52             | 40          | 0.04791           | 51         | 0.02998           | 3          | 0.09985           |            |                   |
| 25             | <b>43</b>  | 0.01121           | <b>7</b>   | 0.00742           | 37         | 0.01936           | 53             | 39          | 0.04797           | 40         | 0.03354           | 40         | 0.10001           |            |                   |
| 26             | <b>19</b>  | 0.01178           | 55         | 0.00756           | 36         | 0.01936           | 54             | 46          | 0.05226           | 3          | 0.03449           | 52         | 0.10005           |            |                   |
| 27             | <b>14</b>  | 0.01181           | <b>2</b>   | 0.00758           | 38         | 0.01938           | 55             | 31          | 0.06258           | 46         | 0.03515           | 31         | 0.10199           |            |                   |
| 28             | <b>20</b>  | 0.01313           | <b>1</b>   | 0.00759           | <b>41</b>  | 0.01940           | 56             | 52          | 0.06360           | 16         | 0.03556           | 46         | 0.10589           |            |                   |

1 **Table S6.** Total energy rank of  $\text{Li}_{1-x}\text{FePO}_4$  ( $x = 0.625$ ) derived from the combination of vacancy  
2 contents ( $x$ ). Structures within the lowest 10% energy range from CHGNet are marked in **bold**  
3 **black** text, and those from M3GNet are marked in *red italic* text. Differences in results due to  
4 calculation and boundary conditions in DFT calculations (**highlighted orange**) are assumed to be  
5 less than 0.01 eV per formula unit (f.u.).  
6 Through the manuscript, we discovered that MLIPs are unable to accurately predict phase  
7 formation and voltage profiles during the charging process. Given that voltage inference is a

1 critical factor in electrode material development, *ab initio* calculations are essential. However, as  
2 shown in Figure S1, DFT calculations require significantly more time compared to MLIPs. It is  
3 inefficient to determine all possible configurations of Li ion vacancies using DFT calculation alone.  
4 If MLIPs can effectively infer Li ion configurations, they would be valuable as a preprocessing step  
5 before DFT calculations. Based on this assumption, Table Sx1-Sx4 illustrates how well the most  
6 stable energy structures predicted by MLIPs align with PBE calculation results. Although there is  
7 a need for cross-validation through multiple materials due to the limited comparison data in this  
8 study, MLIPs appear to be effective in inferring the arrangement of Li ions during the delithiation  
9 process.

10

11

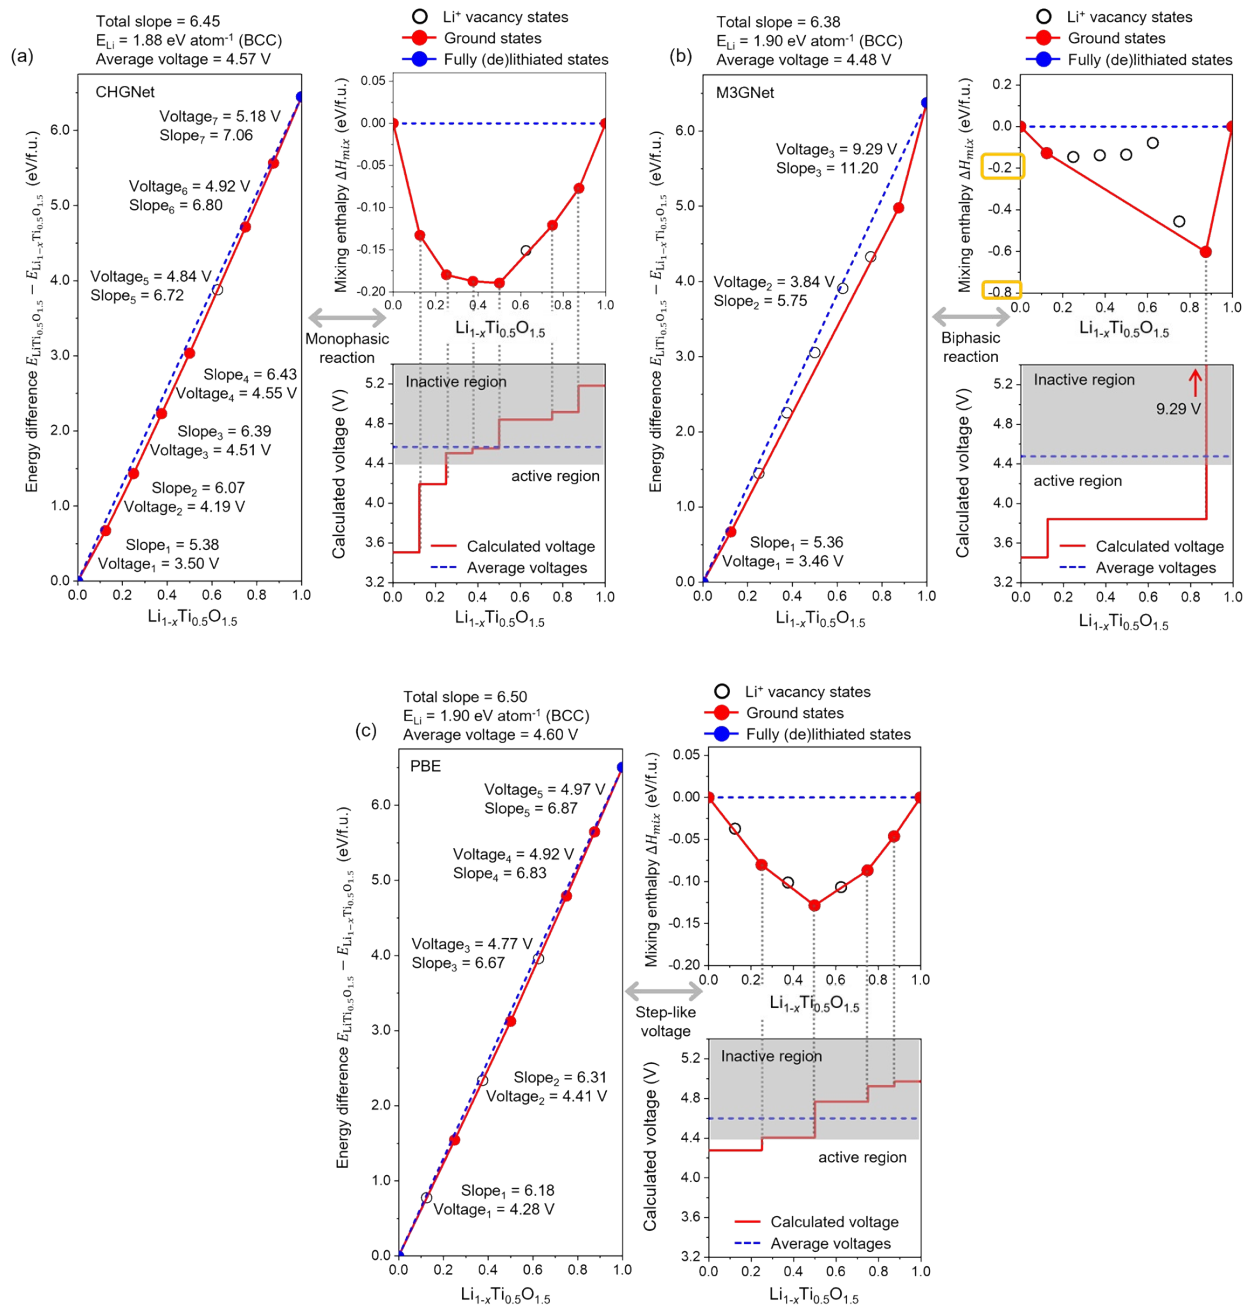

1

2 **Fig. S4.** Energy difference between fully lithiated and delithiated state of  $\text{Li}_{1-x}\text{Ti}_{0.5}\text{O}_{1.5}$  (left).

3 Formation energy of mixing enthalpy (top right). Calculated voltage based on formation energy

4 of mixing enthalpy (bottom right). (a) CHGNet, (b) M3GNet and (c) PBE.

5

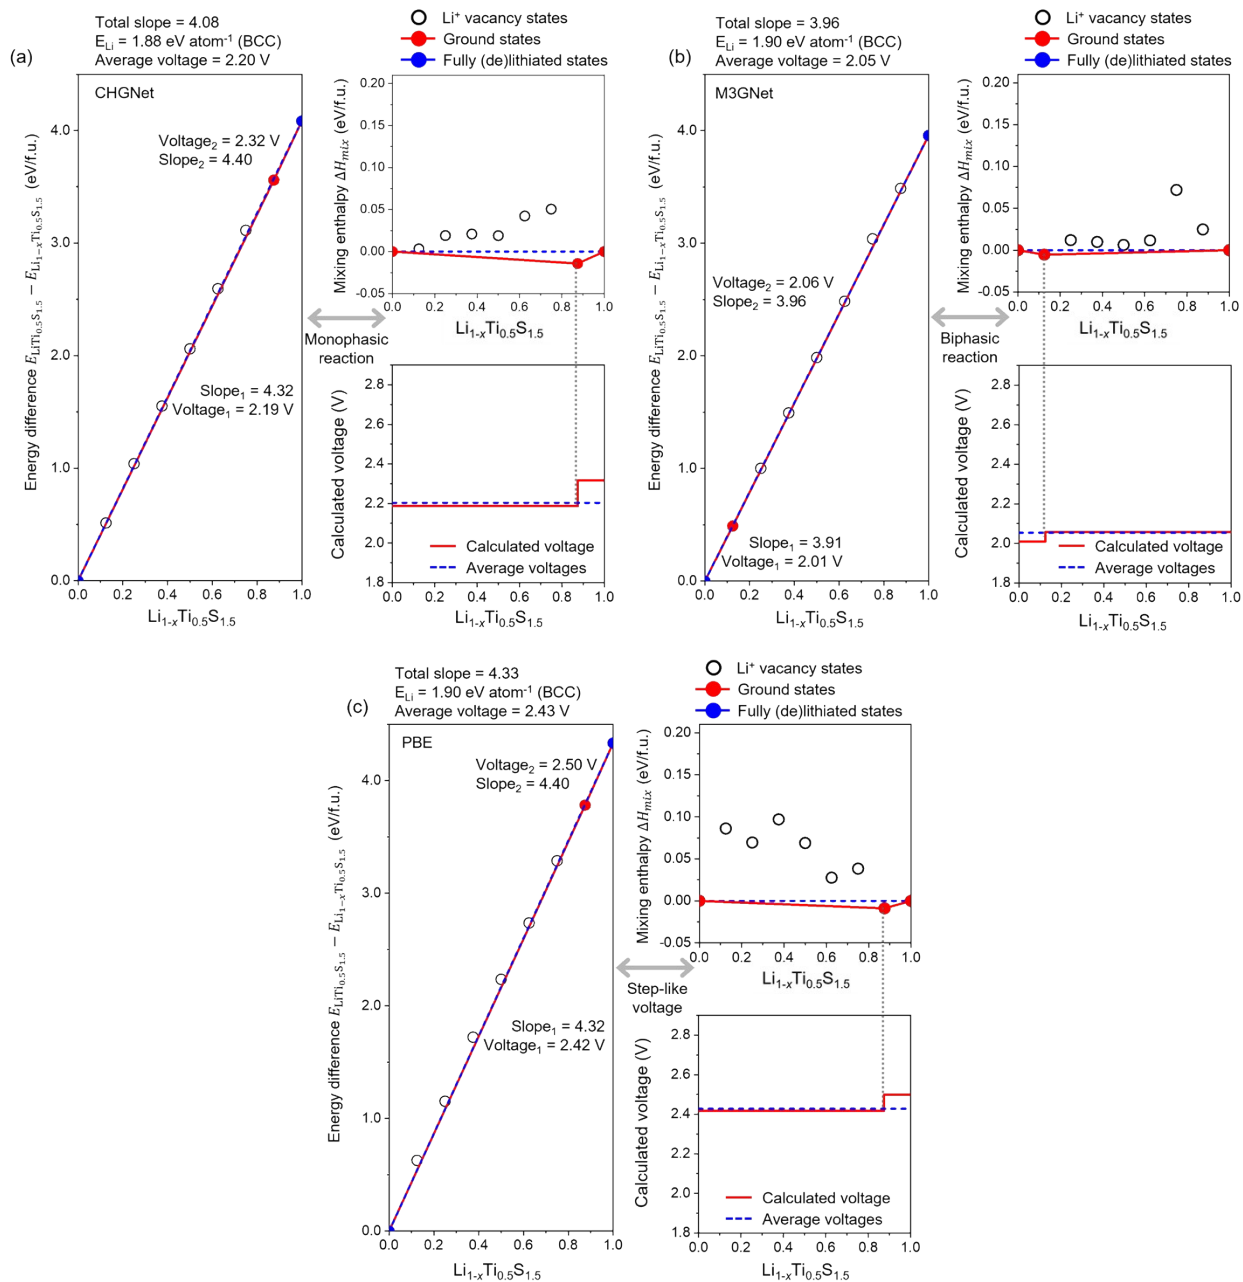

1

2 **Fig. S5.** Energy difference between fully lithiated and delithiated state of  $\text{Li}_{1-x}\text{Ti}_{0.5}\text{S}_{1.5}$  (left).

3 Formation energy of mixing enthalpy (top right). Calculated voltage based on formation energy

4 of mixing enthalpy (bottom right). (a) CHGNet, (b) M3GNet and (c) PBE.

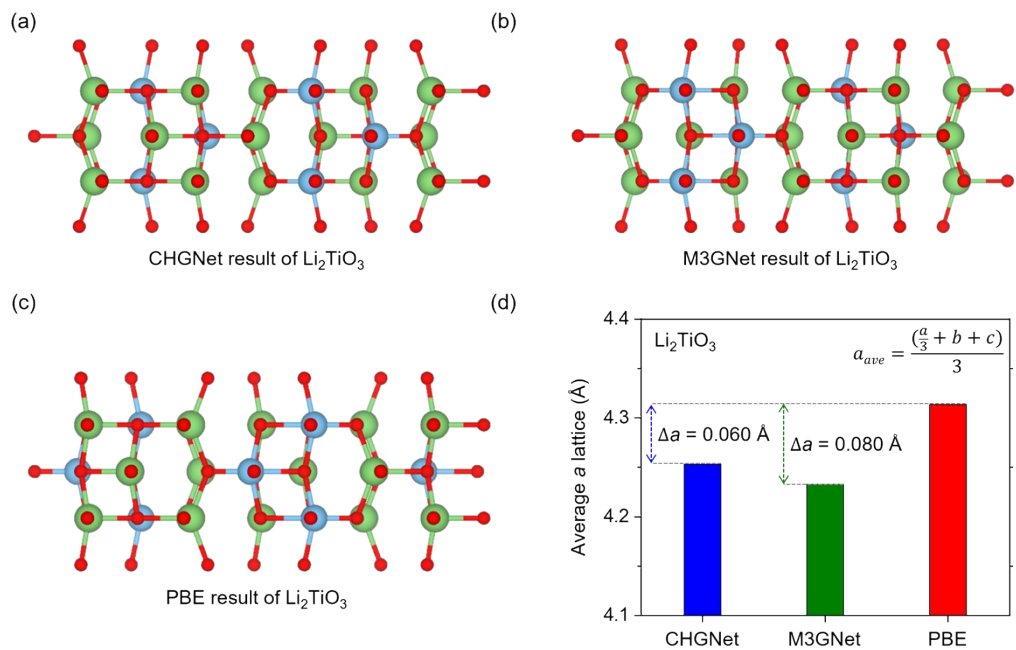

1

2 **Fig S6.** (a-c) Schematic diagrams and atomic configuration of  $\text{Li}_2\text{TiO}_3$  with the lowest energy

3 values calculated. (d) Lattice parameters as determined by CHGNet, M3GNet, and PBE results.

4

5

6

| Spinel LiMnO <sub>2</sub> |        |        |       |
|---------------------------|--------|--------|-------|
| (Å)                       | CHGNet | M3GNet | PBE   |
| <i>a</i> lattice          | 2.874  | 2.878  | 2.869 |
| <i>b</i> lattice          | 4.634  | 4.680  | 4.647 |
| <i>c</i> lattice          | 5.820  | 5.816  | 5.837 |
| Shortest Mn–O             | 1.943  | 1.938  | 1.942 |
| Longest Mn–O              | 2.334  | 2.349  | 2.34  |
| Average Mn–O              | 2.084  | 2.091  | 2.087 |

- 1 **Table S7.** Comparison of lattice parameters and Mn–O of MnO<sub>6</sub> octahedral about LiMnO<sub>2</sub> spinel
- 2 structure.
- 3

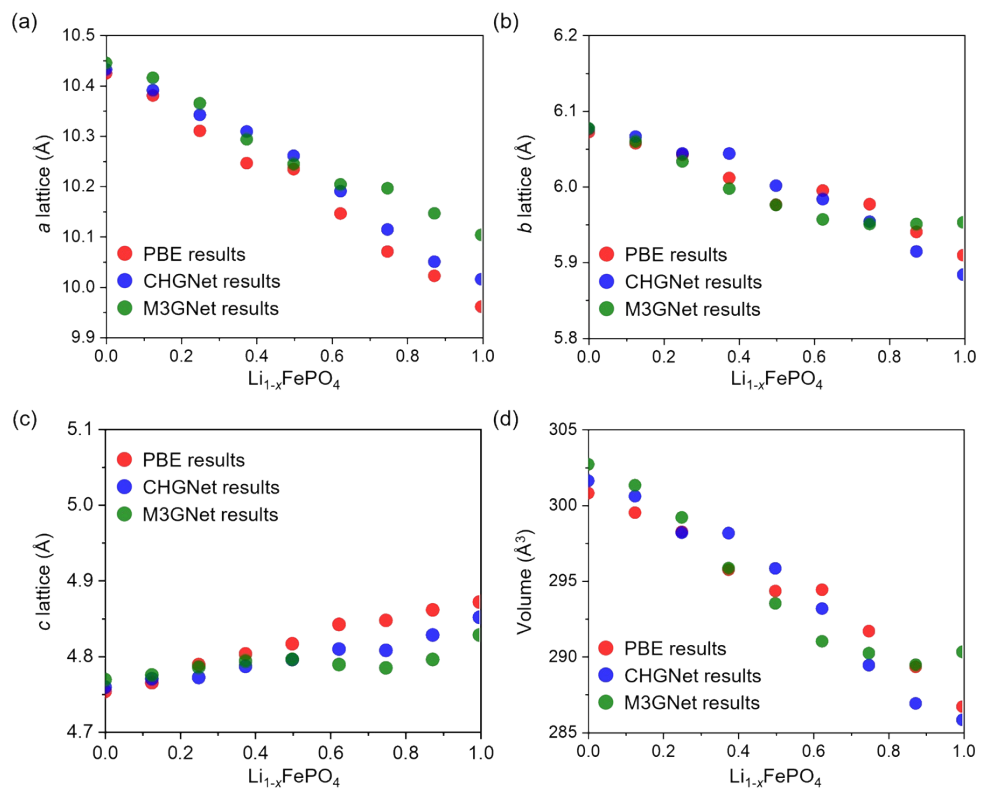

1  
 2 **Fig S7.** Displacements in lattice constants and volume of  $\text{Li}_{1-x}\text{FePO}_4$  as a function of Li ion  
 3 vacancy content of ( $x$ ), using PBE and MLIPs.  
 4  
 5

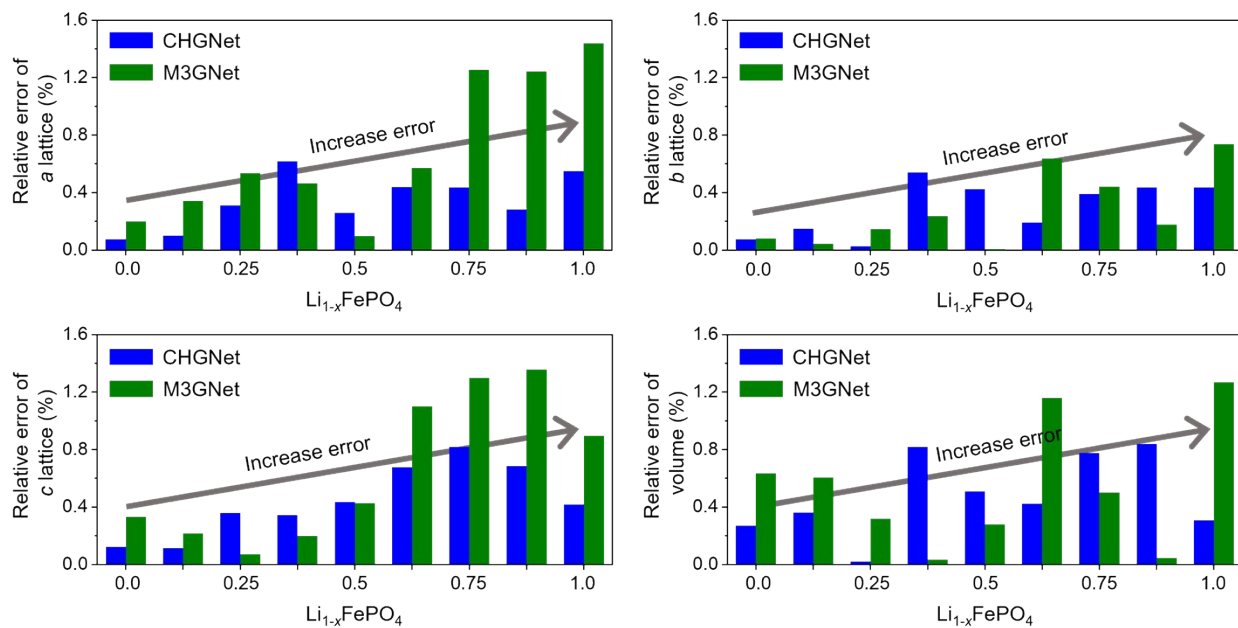

1

2 **Fig S8.** Changes in relative errors of lattice parameters and volume during the delithiation  
 3 process in  $\text{Li}_{1-x}\text{FePO}_4$ . The results from PBE and MLIPs were compared, showing a tendency of  
 4 increasing relative errors as the amount of Li ion vacancy ( $x$ ) increases.

5
